# Supplementary material for: Anti-cancer effects of torulene, isolated from Sporidiobolus pararoseus, on human prostate cancer LNCaP and PC-3 cells via a mitochondrial signal pathway and the down-regulation of AR expression
Source: Royal Society of Chemistry journal article supplement (doi:10.1039/c6ra24721k), 2017-01-01

### Supplementary material-1

Effects of torulene on the apoptosis rate in LNCaP and PC-3 cells.  $2.5 \times 10^5$  cells were seeded into a 6-well plate and treated with or without torulene (10, 20 and 30  $\mu\text{mol/L}$ ) for 24 h. Annexin V-PI staining was proceeded to determine apoptotic cell populations, n=3.

| Group                | Normal%    | Early apoptosis% | Late apoptosis% | Necrosis%  |
|----------------------|------------|------------------|-----------------|------------|
| LNCaP cells          |            |                  |                 |            |
| Control              | 94.96±0.61 | 0.29±0.06        | 0.30±0.04       | 4.45±0.07  |
| 10 $\mu\text{mol/L}$ | 93.99±1.32 | 0.19±0.05        | 0.25±0.05       | 5.57±0.12  |
| 20 $\mu\text{mol/L}$ | 72.70±0.85 | 7.96±0.15        | 6.00±0.81       | 13.34±0.27 |
| 30 $\mu\text{mol/L}$ | 72.30±0.94 | 0.01±0.01        | 0.42±0.02       | 27.27±0.02 |
| PC-3 cells           |            |                  |                 |            |
| Control              | 94.18±1.34 | 0.62±0.03        | 2.12±0.15       | 3.08±0.47  |
| 10 $\mu\text{mol/L}$ | 93.76±0.54 | 0.91±0.08        | 2.37±0.28       | 2.96±0.23  |
| 20 $\mu\text{mol/L}$ | 91.99±0.97 | 1.62±0.05        | 3.65±0.81       | 2.74±0.30  |
| 30 $\mu\text{mol/L}$ | 89.53±0.66 | 0.76±0.05        | 4.54±0.22       | 5.17±0.47  |

## Supplementary material-2

The melting curve data of Bcl-2, Bax, AR and PSA in LNCaP cells and Bcl-2, Bax in PC-3 cells.

( $\beta$ -actin was used as the control, n=4).

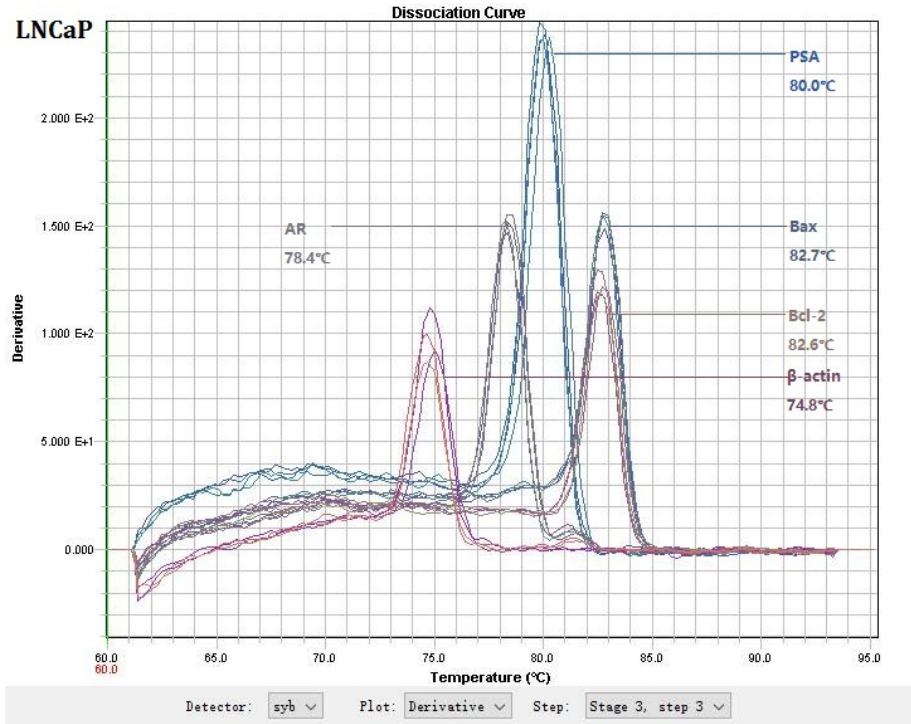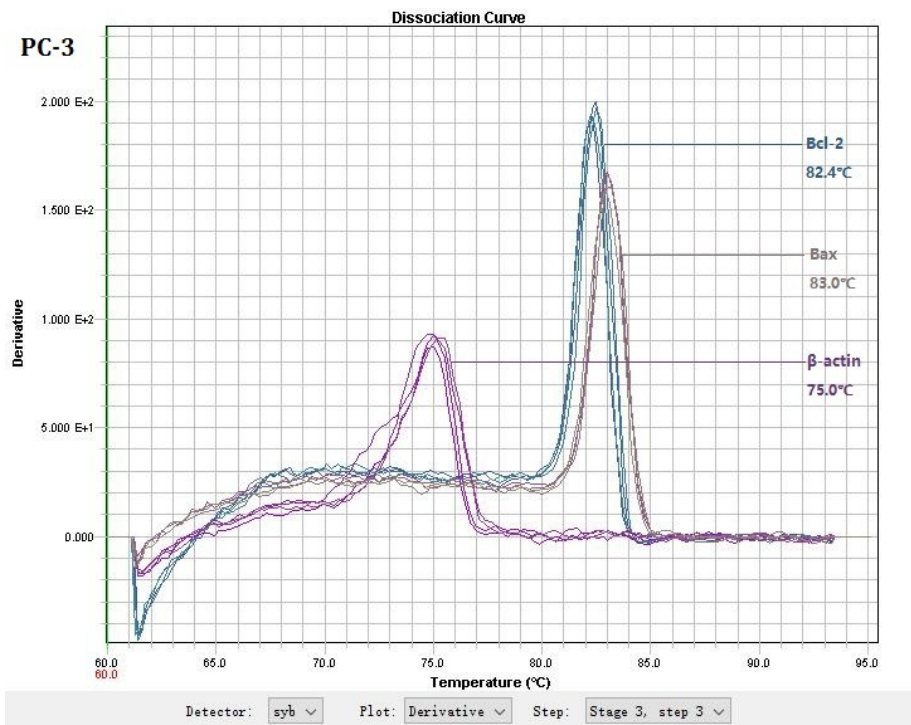

Supplement: c6ra24721k1.pdf [file c6ra24721k1.pdf]
